# Supplementary material for: Improved luminance and external quantum efficiency of red and white organic light-emitting diodes with iridium(iii) complexes with phenyl-substituted 2-phenylpyridine as a second cyclometalated ligand
Source: Royal Society of Chemistry journal article supplement (doi:10.1039/c5tc02728d), 2015-01-01

## Electronic Supplementary Information (ESI)

### Improved luminance and external quantum efficiency of red and white organic light-emitting diodes with iridium(III) complexes with phenyl-substituted 2-phenylpyridine as a second cyclometalated ligand

Hee Un Kim,<sup>a</sup> Jae-Ho Jang,<sup>a</sup> Wook Song,<sup>b</sup> Byung Jun Jung,<sup>c</sup> Jun Yeob Lee<sup>b</sup> and Do-Hoon Hwang<sup>a,\*</sup>

<sup>a</sup>Department of Chemistry, and Chemistry Institute for Functional Materials, Pusan National University, Busan 609-735, Republic of Korea

<sup>b</sup>School of Chemical Engineering, Sungkyunkwan University 2066, Seobu-ro, Jangan-gu, Suwon, Gyeonggi 440-746, Republic of Korea

<sup>c</sup>Department of Materials Science and Engineering, The University of Seoul, Seoul 130-743, Republic of Korea

*E-mail: [dohoonhwang@pusan.ac.kr](mailto:dohoonhwang@pusan.ac.kr)*

**Fig. S1** MALDI-TOF mass spectra of (PQ)<sub>2</sub>Ir(Pppy) and (DMPQ)<sub>2</sub>Ir(Pppy).

**(a)**

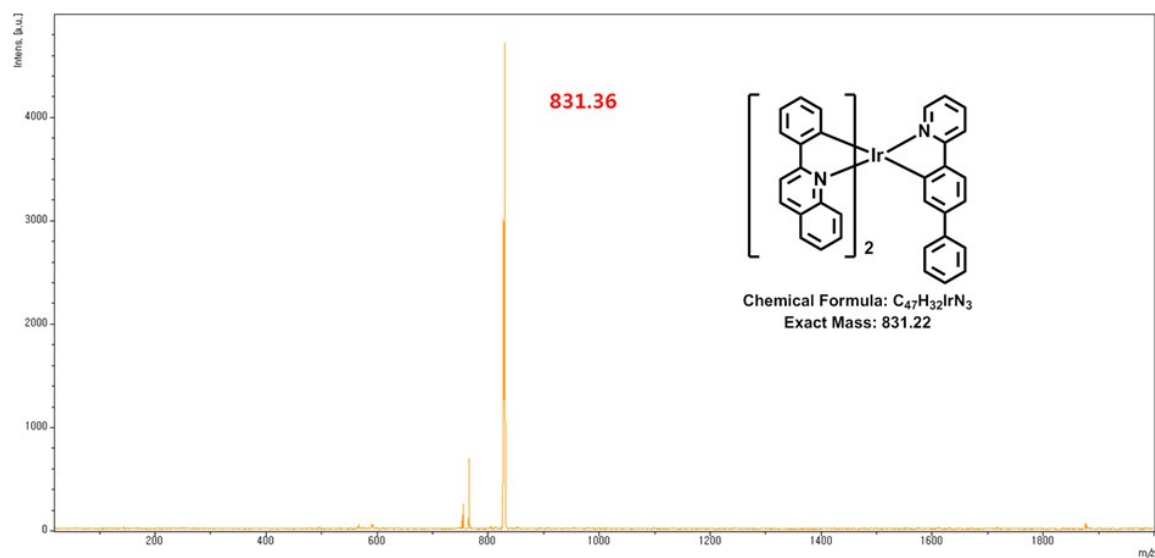

**(b)**

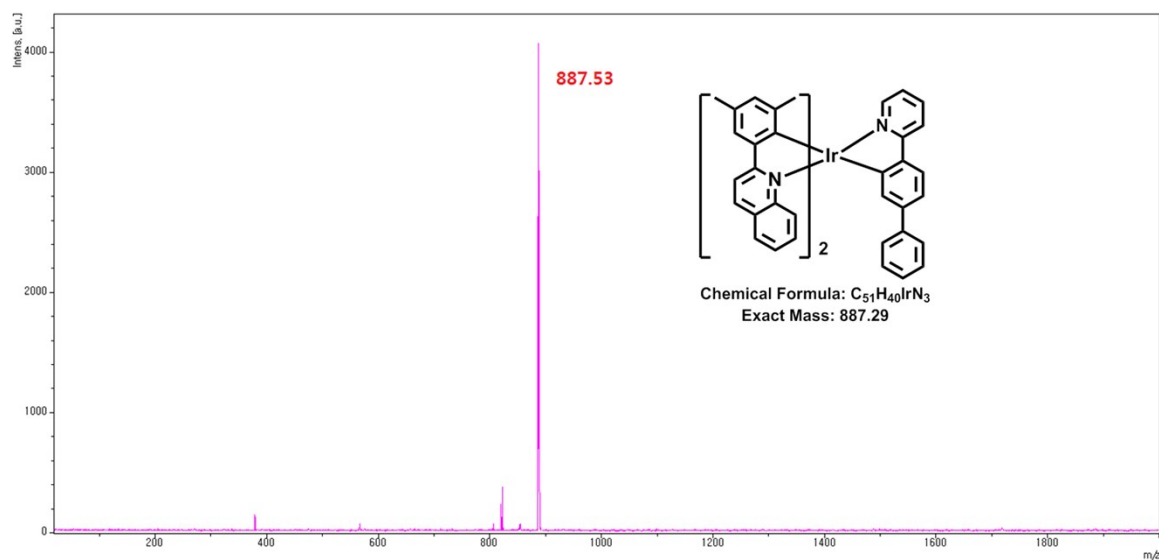

**Fig. S2** High-performance liquid chromatography (HPLC) spectra of (a)  $(PQ)_2Ir(Pppy)$  and (b)  $(DMPQ)_2Ir(Pppy)$ .

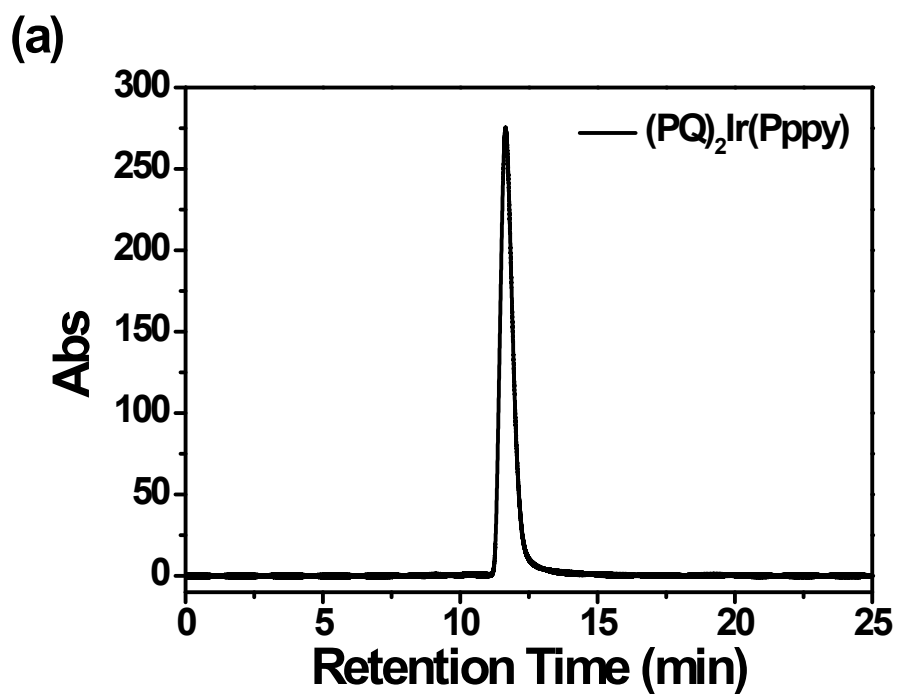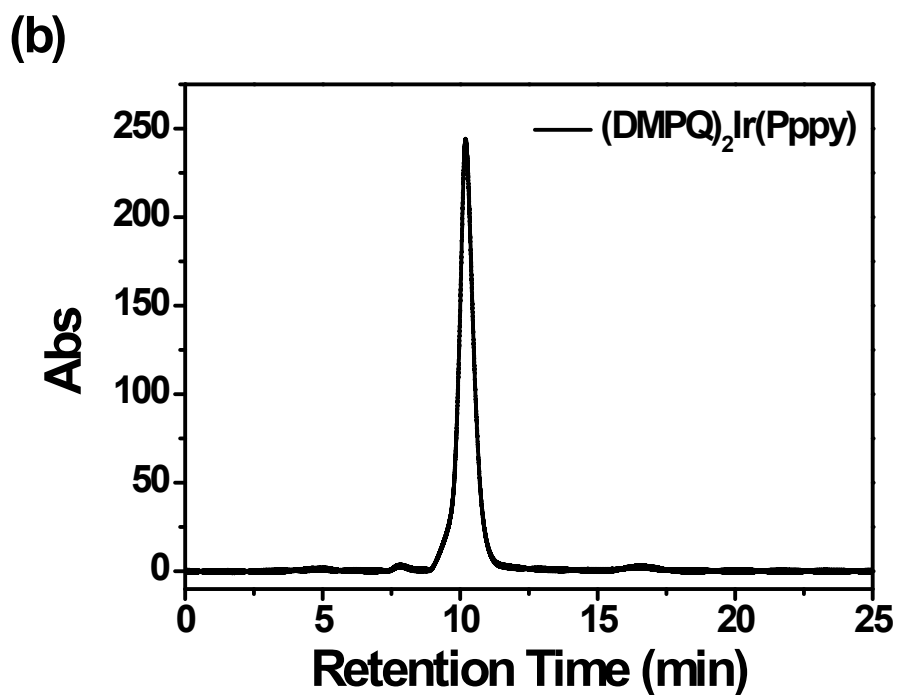

Fig. S3 PL spectra of (a)  $(PQ)_2Ir(Pppy)$  and (b)  $(DMPQ)_2Ir(Pppy)$  in dichloromethane solution and neat film state.

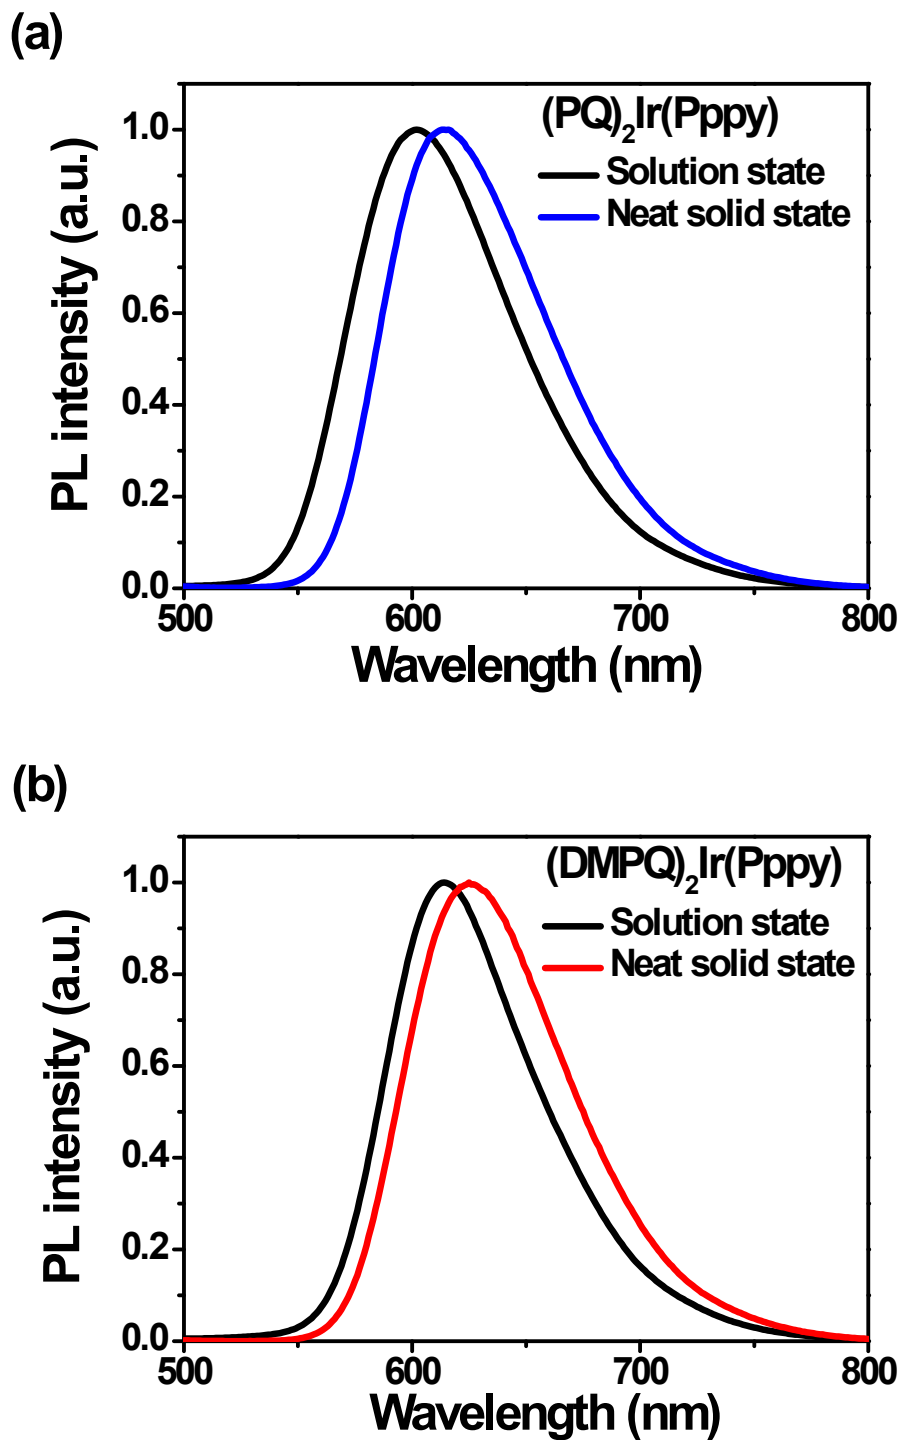

**Fig. S4** HOMO and LUMO of Pppy calculated using DFT at B3LYP/6-31G(d) level.

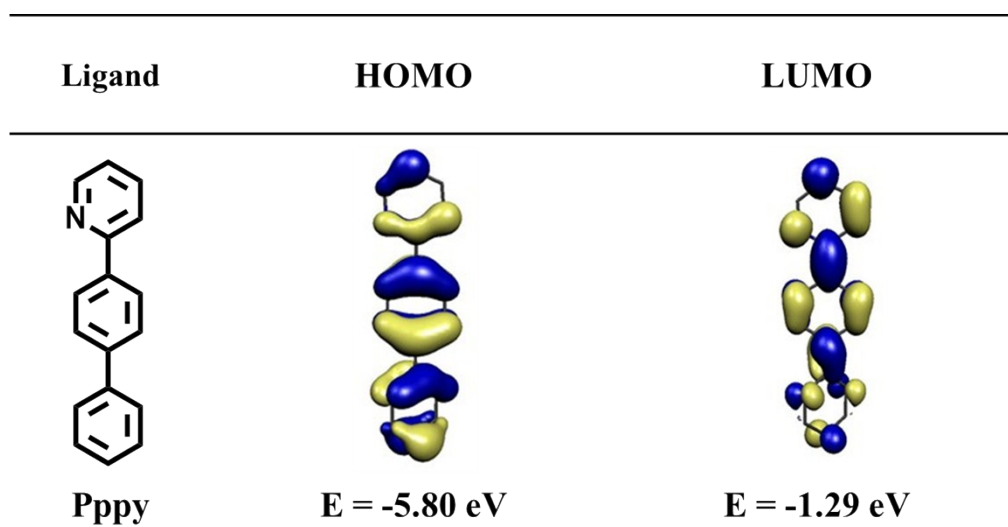

Fig. S5 Cyclic voltammograms of  $(PQ)_2Ir(Pppy)$  and  $(DMPQ)_2Ir(Pppy)$ .

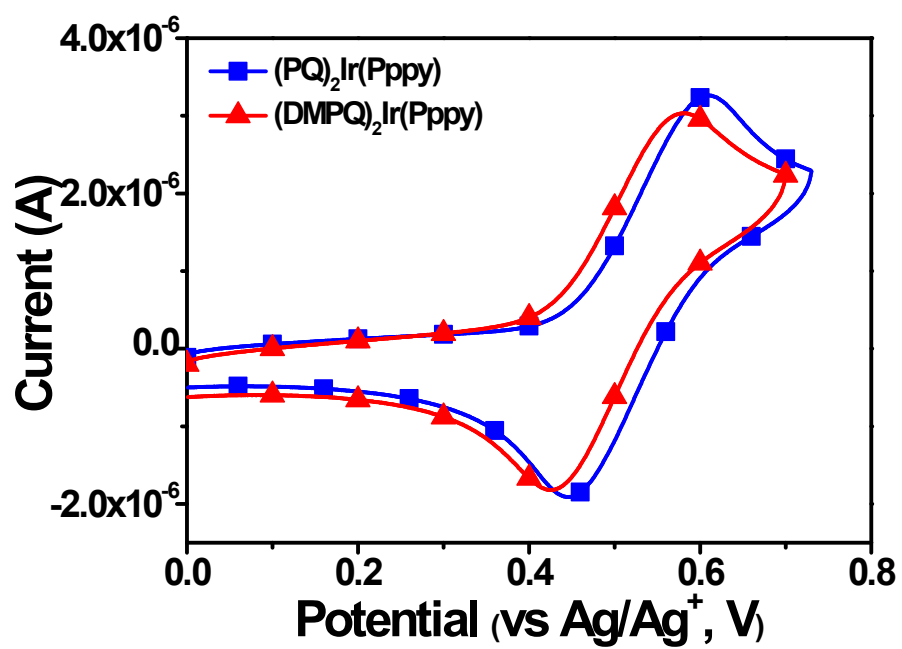

**Fig. S6** Current density-voltage-luminance (*I-V-L*) of (a)  $(PQ)_2Ir(Pppy)$  and (b)  $(DMPQ)_2Ir(Pppy)$  devices with different doping concentrations.

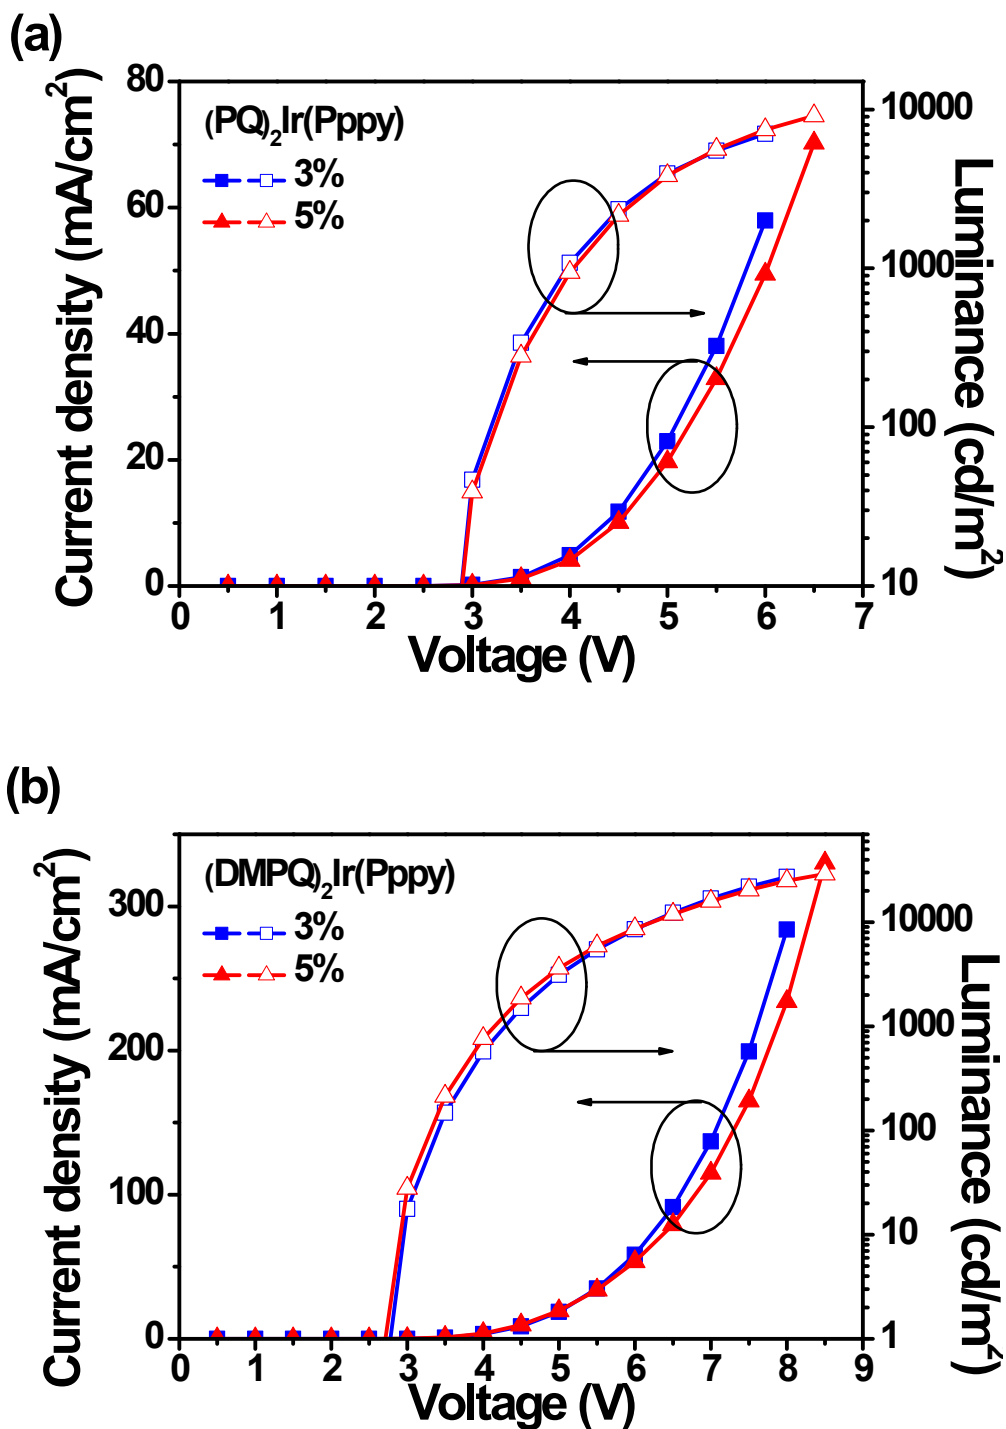

**Fig. S7** External quantum efficiency-current density-luminous efficiency curves (EQE-*I*-LE) of (a) (PQ)<sub>2</sub>Ir(Pppy) and (b) (DMPQ)<sub>2</sub>Ir(Pppy) devices with different doping concentrations.

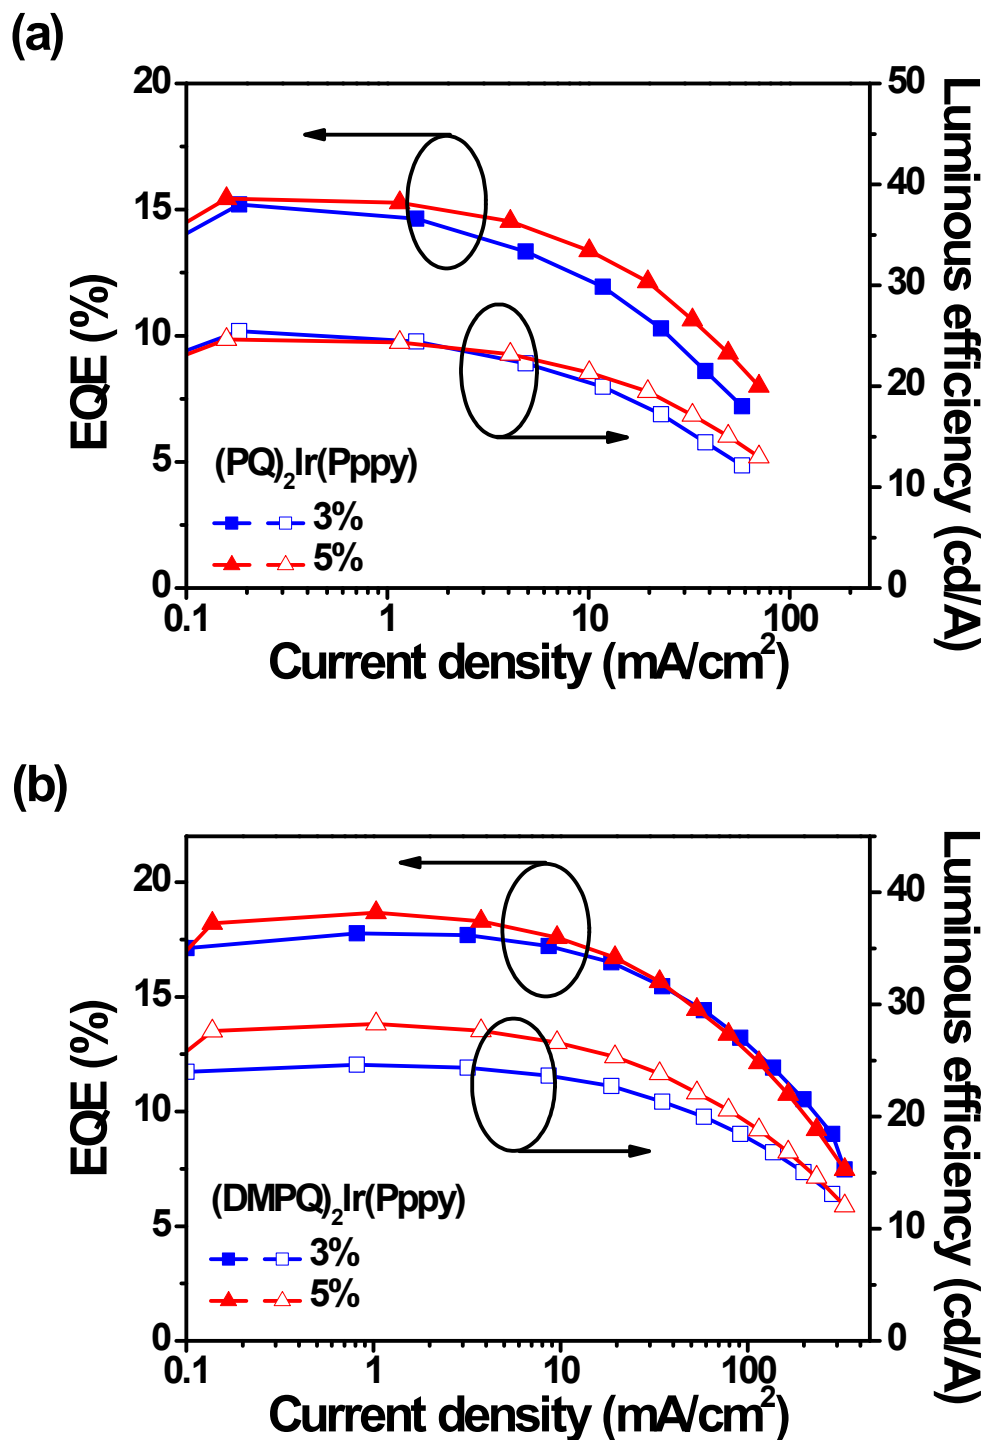

Supplement: c5tc02728d1.pdf [file c5tc02728d1.pdf]
